# Supplementary material
Source: PubMed Central journal article supplement (PMC2965336)
Supplement: NIHMS198697-supplement-Supp1.pdf [file NIHMS198697-supplement-Supp1.pdf]

**Online Supplemental**

Short title: Portal Osmopressor Mechanism Linked to TRPV4

**Portal Osmopressor Mechanism Linked to TRPV4 and Blood Pressure  
Control**

Julia McHugh<sup>1</sup>, Nancy R. Keller<sup>1</sup>, Martin Appalsamy<sup>1</sup>, Steven A. Thomas<sup>2</sup>, Satish R. Raj<sup>1</sup>,  
André Diedrich<sup>1,3</sup>, Italo Biaggioni<sup>1</sup>, Jens Jordan<sup>4</sup>, and David Robertson<sup>1,5,6</sup>

<sup>1</sup>*Autonomic Dysfunction Center, Departments of Medicine and Pharmacology, Vanderbilt University,* <sup>2</sup>*Department of Pharmacology, University of Pennsylvania, Philadelphia, PA,* <sup>3</sup>*Department of Biomedical Engineering, Vanderbilt University,* <sup>4</sup>*Institute of Clinical Pharmacology, Medical School Hannover, Carl-Neuberg-Straße 1, D-30626 Hannover, Germany,* <sup>5</sup>*Department of Neurology, Vanderbilt University,* <sup>6</sup>*Center for Molecular Neuroscience, Vanderbilt University*

Corresponding Author: David Robertson M.D., Director  
Clinical & Translational Research Center  
Vanderbilt Institute for Clinical and Translational Research  
Elton Yates Professor of Medicine, Pharmacology and Neurology  
Vanderbilt University School of Medicine  
AA 3228 Medical Center North  
1161 21<sup>st</sup> Avenue South  
Nashville TN 37232-2195  
Tel +1 615-343-6499  
Fax +1 615-343-8649  
[David.robertson@vanderbilt.edu](mailto:David.robertson@vanderbilt.edu)

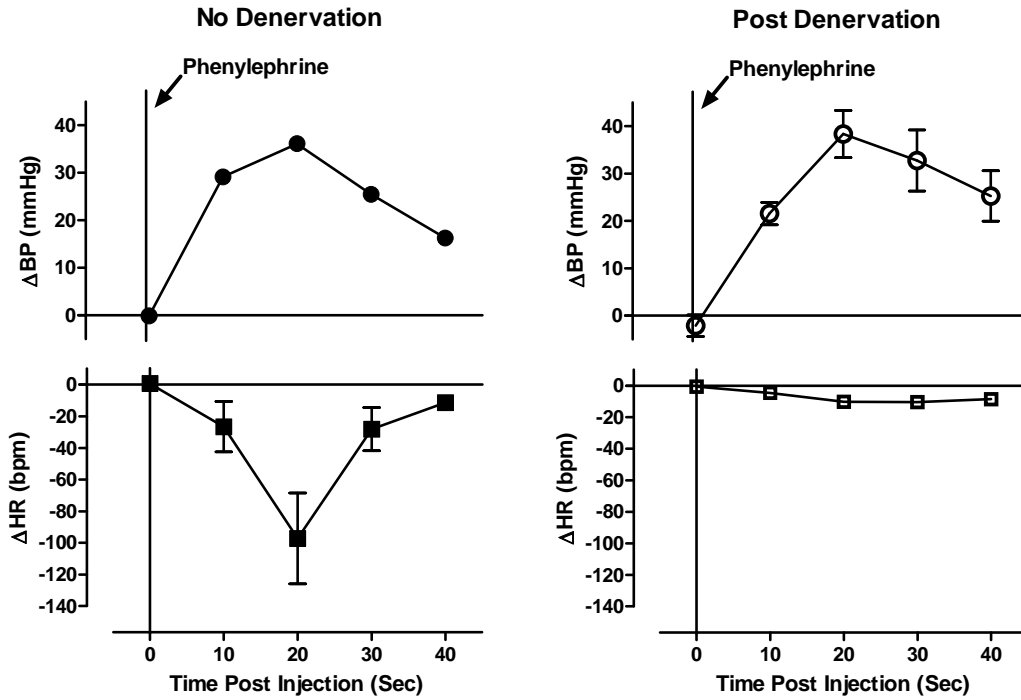

**S1. Blunted HR response to phenylephrine after baroreflex deafferentation.**

Representative BP and HR changes after i.v. phenylephrine (t = 0), pre and post baroreflex deafferentation. Phenylephrine challenge was used to validate successful baroreflex deafferentation in mice.

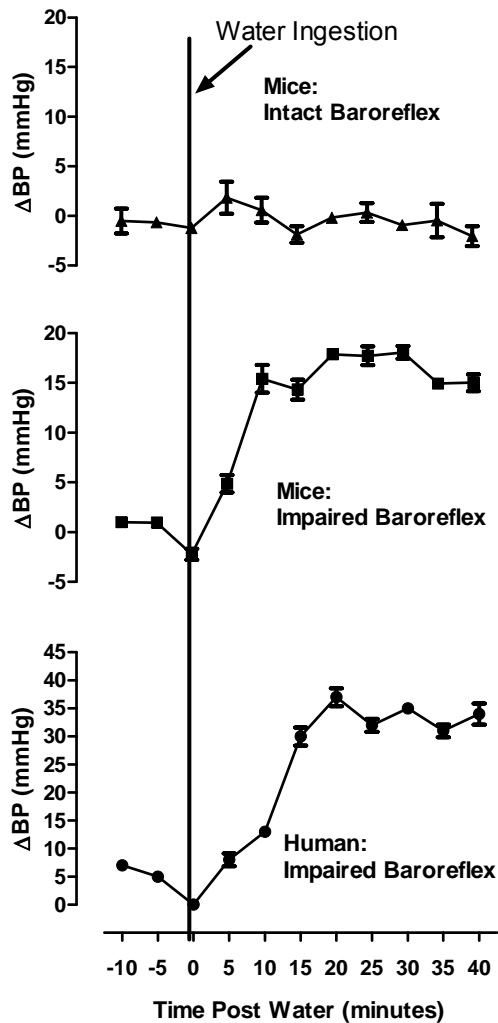

## S2. BP profile during water consumption in humans and mice.

Mice with intact baroreflexes show little BP response to water infusion, since baroreflex buffering attenuates it. Surgically baroreflex-impaired mice, as well as patients with baroreflex impairment, show a robust increase in BP that is sustained well beyond the period of water ingestion. This enhanced pressor response facilitates mechanistic studies of water's cardiovascular effects.

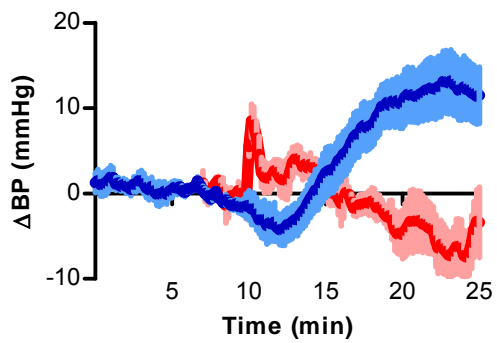

**S3. Role of plasma volume in pressor response.** 150  $\mu$ L intravenous saline (*red*), given at 10 minutes elicited only a small, transient pressor response. Duodenal (*blue*) infusion of water is shown for comparison.

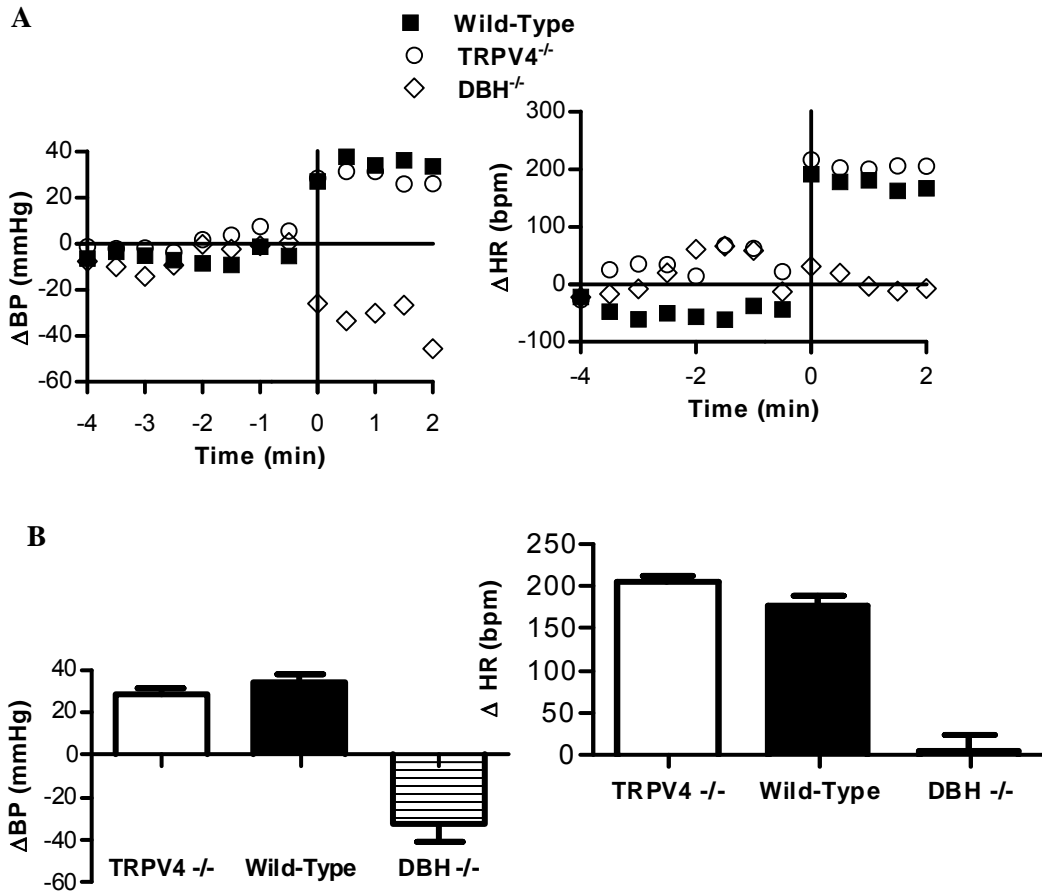

**S4. *Trpv4*<sup>-/-</sup> have intact sympathetic efferents.** A, Representative tracings of the change in BP and HR during restraint for wild-type (■), *Trpv4*<sup>-/-</sup> (○), and *Dbh*<sup>-/-</sup> (◇) mice. B, Average change in BP and HR during 2-minute restraint.
